# Supplementary material for: A loop of cancer-stroma-cancer interaction promotes peritoneal metastasis of ovarian cancer via TNFα-TGFα-EGFR
Source: PubMed Central journal article supplement — Oncogene. 2017 Feb 6;36(25):3576–87. doi: 10.1038/onc.2016.509 (PMC5485181; doi:10.1038/onc.2016.509), 2017-02-06
Supplement: onc2016509x12.pdf [file onc2016509x12.pdf]

**Supplementary Table 1**

Supplementary Table 1. Clinicopathologic features of the patients with ovarian cancer included in the study.

| Case  | Age | Diagnosis |       |                             | Relapse Status | Survival Status       | Omentum Invasion | Lymph Node Invasion | Chemotherapy                             |
|-------|-----|-----------|-------|-----------------------------|----------------|-----------------------|------------------|---------------------|------------------------------------------|
|       |     | Stage     | Grade | Type                        |                |                       |                  |                     |                                          |
| O-215 | 42  | IIIc      | 3     | Clear cell                  | Relapse-free   | Alive without disease | Neg              | Pos                 | Cisplatin/Taxol                          |
| O-217 | 77  | IIc       | N/A   | Serous, borderline          | Relapse-free   | Deceased              | Neg              | Neg                 | No chemotherapy                          |
| O-227 | 50  | IIIc      | 3     | Serous                      | Relapsed       | Alive without disease | Pos              | Pos                 | Carboplatin/Taxol; Carboplatin/CTX       |
| O-234 | 57  | IIc       | 2     | Endometrioid                | Relapse-free   | Deceased              | Pos              | Neg                 | Gemcitabine                              |
| O-250 | 52  | Ic        | 2     | Mucinous                    | Relapse-free   | Alive without disease | Neg              | Neg                 | Cisplatin/CTX                            |
| O-255 | 43  | IIIb      | 3     | Serous                      | Relapsed       | Deceased              | Pos              | Pos                 | Carboplatin/Taxol; Carboplatin/CTX       |
| O-265 | 39  | IVb       | 3     | Serous                      | Relapsed       | Alive without disease | Pos              | Neg                 | No chemotherapy                          |
| O-274 | 31  | Ic        | 3     | Clear cell                  | Relapse-free   | Alive without disease | Neg              | Neg                 | Carboplatin/Taxol                        |
| O-278 | 55  | Ia        | 2     | Endometrioid                | Relapse-free   | Alive without disease | Neg              | Neg                 | No chemotherapy                          |
| O-279 | 46  | Ic        | 2     | Endometrioid                | Relapse-free   | Alive without disease | Neg              | Neg                 | Carboplatin/Taxol                        |
| O-283 | 29  | Ia        | 1     | Mucinous, borderline        | Relapse-free   | Alive without disease | Neg              | Neg                 | No chemotherapy                          |
| O-298 | 39  | Ia        | 1     | Mucinous cystadenocarcinoma | Relapse-free   | Alive without disease | Neg              | Neg                 | No chemotherapy                          |
| O-302 | 43  | IIc       | 2     | Endometrioid                | Relapsed       | Deceased              | Neg              | Neg                 | Carboplatin/Taxol                        |
| O-303 | 84  | Ic        | 3     | Clear cell                  | Relapse-free   | Deceased              | Neg              | Neg                 | No chemotherapy                          |
| O-304 | 44  | Ic        | 2     | Clear cell                  | Relapse-free   | Alive without disease | Neg              | Neg                 | Carboplatin/Taxol                        |
| O-311 | 62  | IIc       | 2     | Endometrioid                | Relapse-free   | Alive without disease | Neg              | Neg                 | Carboplatin/Taxol                        |
| O-314 | 76  | IIIa      | 3     | Serous                      | Relapsed       | Deceased              | Neg              | Neg                 | No chemotherapy                          |
| O-319 | 53  | Recur     | 3     | Serous                      | Relapse-free   | Alive without disease | Neg              | Neg                 | Carboplatin/Taxol; Carboplatin/CTX       |
| O-322 | 62  | IIIc      | N/A   | Adenocarcinoma              | Relapsed       | Alive without disease | Neg              | Neg                 | Neoadjuvant and Postop Carboplatin/Taxol |
| O-325 | 53  | IIIc      | 3     | Adenocarcinoma              | Relapsed       | Deceased              | Pos              | Neg                 | Neoadjuvant and Postop Carboplatin/Taxol |
| O-328 | 58  | IIIc      | 3     | Serous                      | Relapsed       | Deceased              | Pos              | Neg                 | Carboplatin/Taxol                        |
| O-331 | 46  | IV        | 3     | Clear cell                  | Relapse-free   | Deceased              | Neg              | Neg                 | Carboplatin/Taxol                        |
| O-332 | 52  | Ic        | 3     | Clear cell                  | Relapse-free   | Alive without disease | Neg              | Neg                 | Carboplatin/Taxol                        |
| O-336 | 41  | IIIc      | 3     | Serous                      | Relapsed       | Deceased              | Pos              | Neg                 | Carboplatin/Taxol                        |
| O-338 | 45  | IIIc      | 3     | Serous                      | Relapsed       | Deceased              | Pos              | Neg                 | Carboplatin/Taxol; Gemcitabine/Cisplatin |
| O-356 | 40  | IIIc      | 3     | Adenocarcinoma              | Relapsed       | Deceased              | Pos              | Pos                 | Carboplatin/Taxol                        |
