# Supplementary material for: A loop of cancer-stroma-cancer interaction promotes peritoneal metastasis of ovarian cancer via TNFα-TGFα-EGFR
Source: PubMed Central journal article supplement — Oncogene. 2017 Feb 6;36(25):3576–87. doi: 10.1038/onc.2016.509 (PMC5485181; doi:10.1038/onc.2016.509), 2017-02-06
Supplement: onc2016509x13.pdf [file onc2016509x13.pdf]

**Supplementary Table 2**

Supplementary Table 2. Clinicopathologic features of the patients with omental tumor metastasis included in the study.

| Case    | Age | Diagnosis |       |                             | Relapse Status | Survival Status       | Omentum Invasion | Lymph Node Invasion | Chemotherapy                                          |
|---------|-----|-----------|-------|-----------------------------|----------------|-----------------------|------------------|---------------------|-------------------------------------------------------|
|         |     | Stage     | Grade | Type                        |                |                       |                  |                     |                                                       |
| O-286   | 79  | IV        | 3     | Adenocarcinoma              | Relapse-free   | Death                 | Pos              | Neg                 | No chemotherapy                                       |
| O-348   | 68  | IIIc      | 3     | Serous                      | Relapse-free   | Death                 | Pos              | Neg                 | Carboplatin/Taxol                                     |
| O-364   | 76  | IIIc      | 3     | Serous                      | Relapsed       | Death                 | Pos              | Neg                 | Carboplatin/Taxol; Carboplatin                        |
| O-412   | 47  | IIIc      | 3     | Clear cell                  | Relapse-free   | Death                 | Pos              | Neg                 | Carboplatin/Taxol                                     |
| O-413-1 | 66  | IIIc      | 3     | Serous                      | Relapsed       | Death                 | Pos              | Neg                 | Carboplatin/Taxol                                     |
| O-533   | 44  | IIIc      | 3     | Endometrioid                | Relapse-free   | Alive without disease | Pos              | Neg                 | Carboplatin/Taxol                                     |
| O-549   | 42  | IIIc      | High  | Serous                      | Relapsed       | Death                 | Pos              | Pos                 | Carboplatin/Taxol                                     |
| O-592   | 85  | IIIb      | High  | Serous                      | Relapsed       | Death                 | Pos              | Neg                 | No chemotherapy                                       |
| O-648   | 42  | IIIc      | 2     | Endometrioid                | Relapsed       | Death                 | Pos              | Neg                 | Carboplatin/Taxol                                     |
| O-655   | 32  | Recur     | N/A   | Serous                      | Relapse-free   | Alive without disease | Pos              | Neg                 | Carboplatin/Taxol                                     |
| O-660   | 56  | IIIb      | 3     | Serous                      | Relapsed       | Alive with disease    | Pos              | Neg                 | Carboplatin/Taxol; Carboplatin; Gemcitabine/Cisplatin |
| O-682   | 57  | N/A       | High  | Mixed serous and clear cell | Relapse-free   | Death                 | Pos              | Neg                 | Carboplatin/Taxol                                     |
| O-685   | 76  | IIIc      | High  | Serous                      | Relapsed       | Death                 | Pos              | Neg                 | Carboplatin/Taxol; Carboplatin/Gemcitabine            |
| O-701   | 57  | Recur     | High  | Serous                      | Unknown        | Alive                 | Pos              | Neg                 | Carboplatin/Taxol                                     |
| O-748   | 44  | IIIc      | High  | Serous                      | Relapse-free   | Alive without disease | Pos              | Neg                 | Chemotherapy received, drug unknown                   |
| O-764   | 57  | IIIc      | N/A   | Clear cell                  | Relapse-free   | Alive without disease | Pos              | Neg                 | Carboplatin/Taxol                                     |
