# Supplementary material for: A loop of cancer-stroma-cancer interaction promotes peritoneal metastasis of ovarian cancer via TNFα-TGFα-EGFR
Source: PubMed Central journal article supplement — Oncogene. 2017 Feb 6;36(25):3576–87. doi: 10.1038/onc.2016.509 (PMC5485181; doi:10.1038/onc.2016.509), 2017-02-06
Supplement: onc2016509x14.pdf [file onc2016509x14.pdf]

**Supplementary Table 3**

Supplementary Table 3. Scoring of IHC staining of TNF- $\alpha$ , TGF- $\alpha$ , and EGFR in omental metastases from patients with advanced ovarian cancer.

|         | <b>TGF<math>\alpha</math></b> |           | <b>TNF<math>\alpha</math></b> |           | <b>EGFR</b>     |           |
|---------|-------------------------------|-----------|-------------------------------|-----------|-----------------|-----------|
|         | Fibroblasts                   |           | Cancer Cells                  |           | Cancer Cells    |           |
|         | % of Reactivity               | Intensity | % of Reactivity               | Intensity | % of Reactivity | Intensity |
| O-286   | 0                             | -         | 100                           | ++        | 100%            | ++        |
| O-348   | 50                            | +++       | 100                           | +++       | 100%            | +         |
| O-364   | 50                            | +++       | 100                           | +++       | -               | -         |
| O-412   | 30                            | +         | 100                           | +++       | -               | -         |
| O-413-1 | 30                            | ++        | 100                           | +         | 10%             | +         |
| O-533   | 10                            | +         | 100                           | +++       | 10%             | ++        |
| O-549   | 0                             | -         | 100                           | ++        | 10%             | +         |
| O-592   | 0                             | -         | 100                           | +         | 100%            | +         |
| O-648   | 50                            | ++        | 100                           | ++        | 100%            | +++       |
| O-655   | 10                            | +         | 100                           | +++       | 100%            | +++       |
| O-660   | 10                            | +         | 100                           | +++       | 100%            | ++        |
| O-682   | 90                            | ++        | 100                           | ++        | 100%            | +++       |
| O-685   | 10                            | +++       | 100                           | +++       | 100%            | ++        |
| O-701   | 10                            | +++       | 100                           | +++       | 50%             | ++        |
| O-748   | 10                            | +         | 100                           | ++        | 100%            | +++       |
| O-764   | 30                            | ++        | 100                           | +++       | 100%            | ++        |
