# Supplementary figures and images for: A loop of cancer-stroma-cancer interaction promotes peritoneal metastasis of ovarian cancer via TNFα-TGFα-EGFR
Source: PubMed Central journal article supplement — Oncogene. 2017 Feb 6;36(25):3576–87. doi: 10.1038/onc.2016.509 (PMC5485181; doi:10.1038/onc.2016.509), 2017-02-06

# Supplementary Figure 9

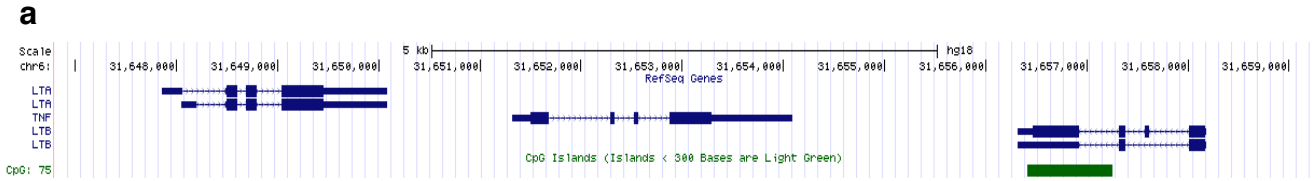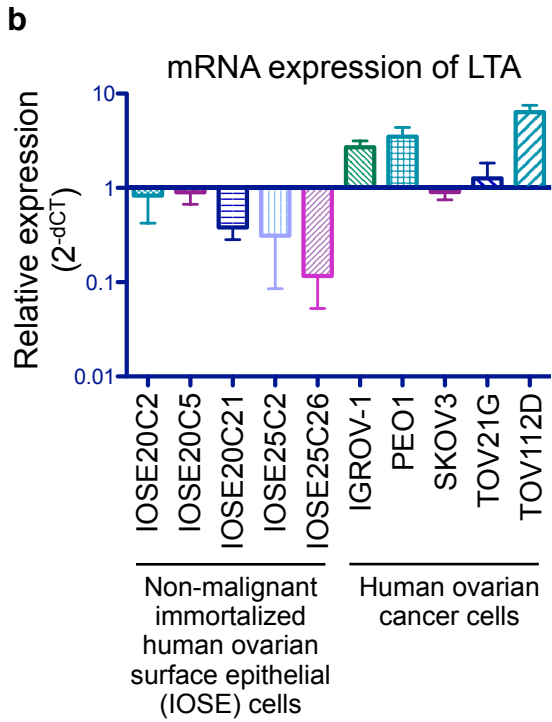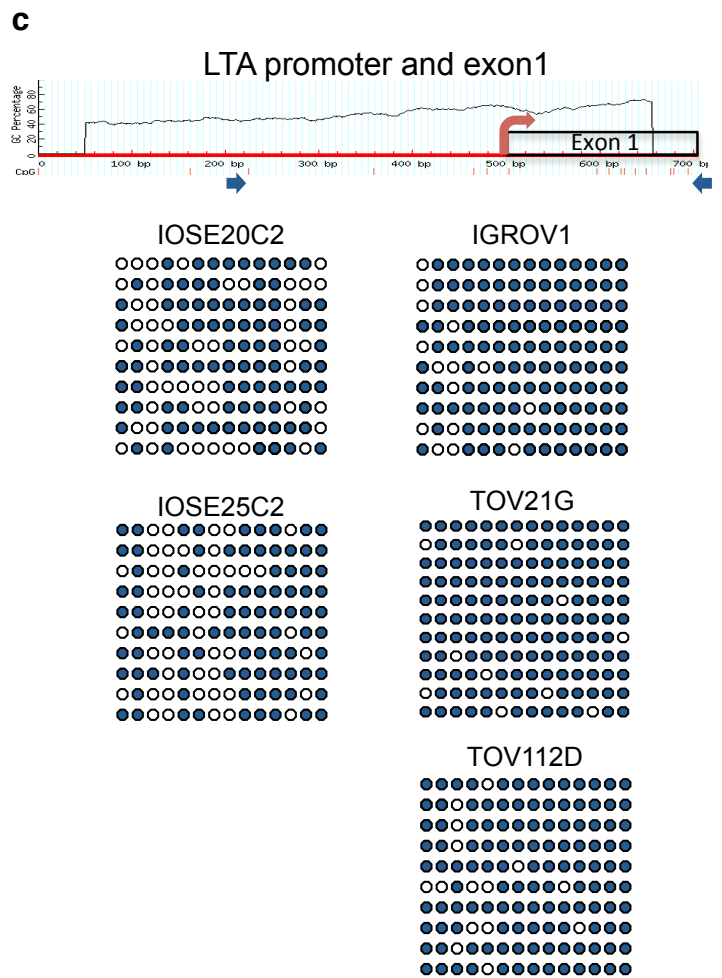

Supplement: onc2016509x10.pdf [file onc2016509x10.pdf]

Supplementary Figure 10

**a**

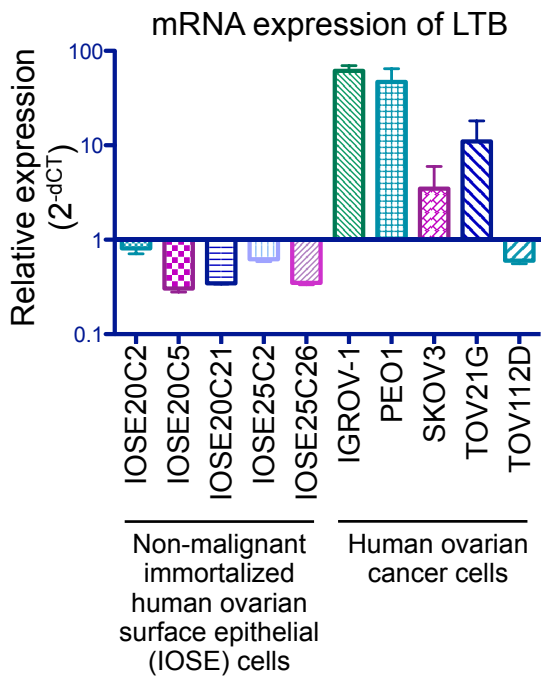

**b**

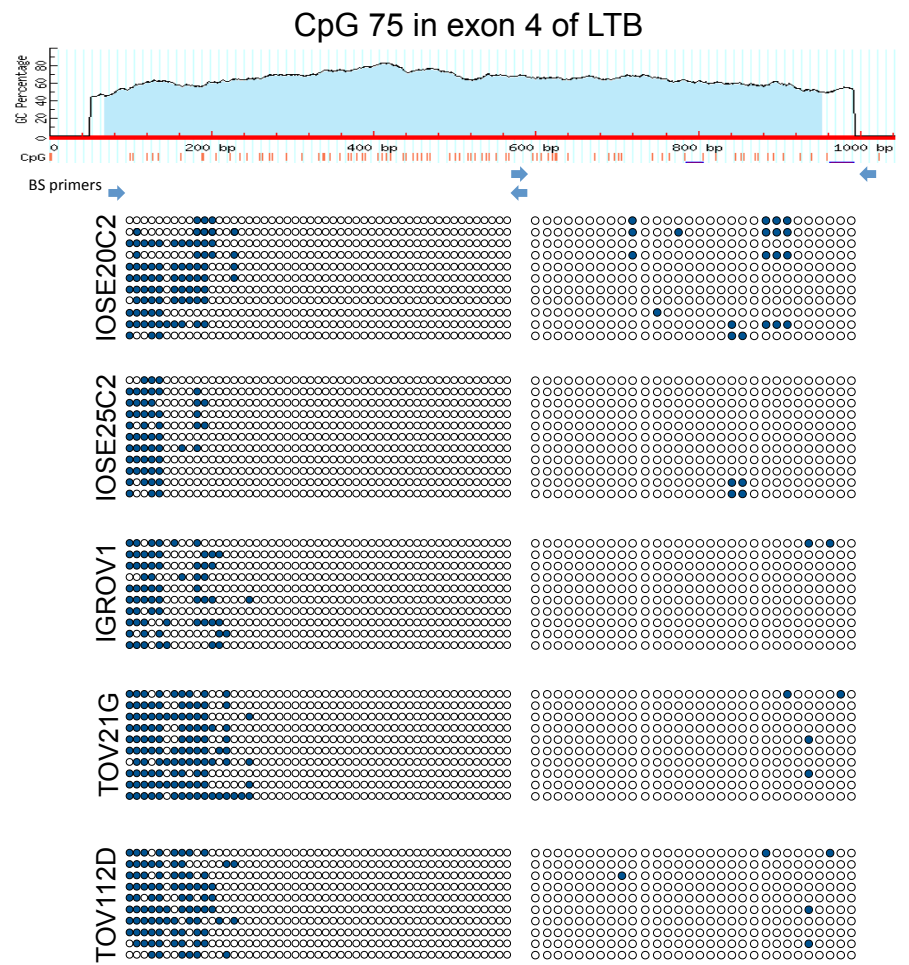

Supplement: onc2016509x11.pdf [file onc2016509x11.pdf]

# Supplementary Figure 1

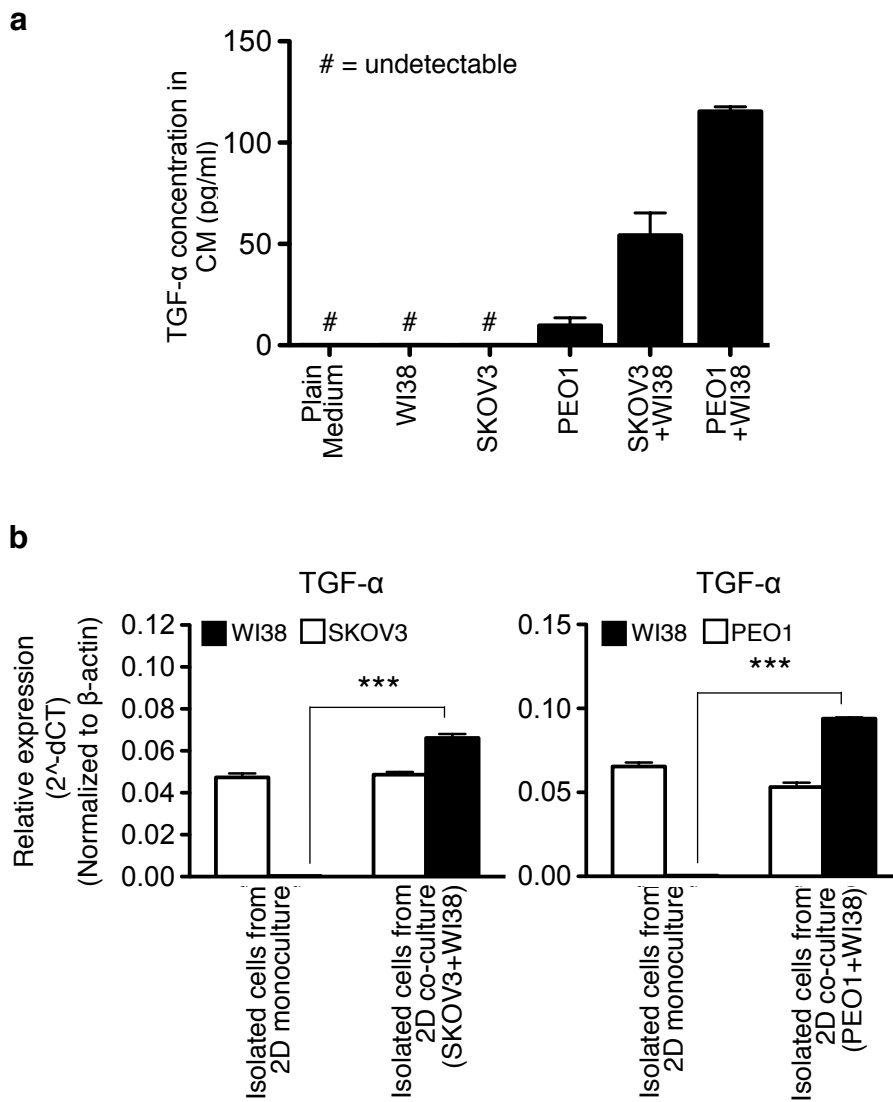

Supplement: onc2016509x2.pdf [file onc2016509x2.pdf]

Supplementary Figure 2

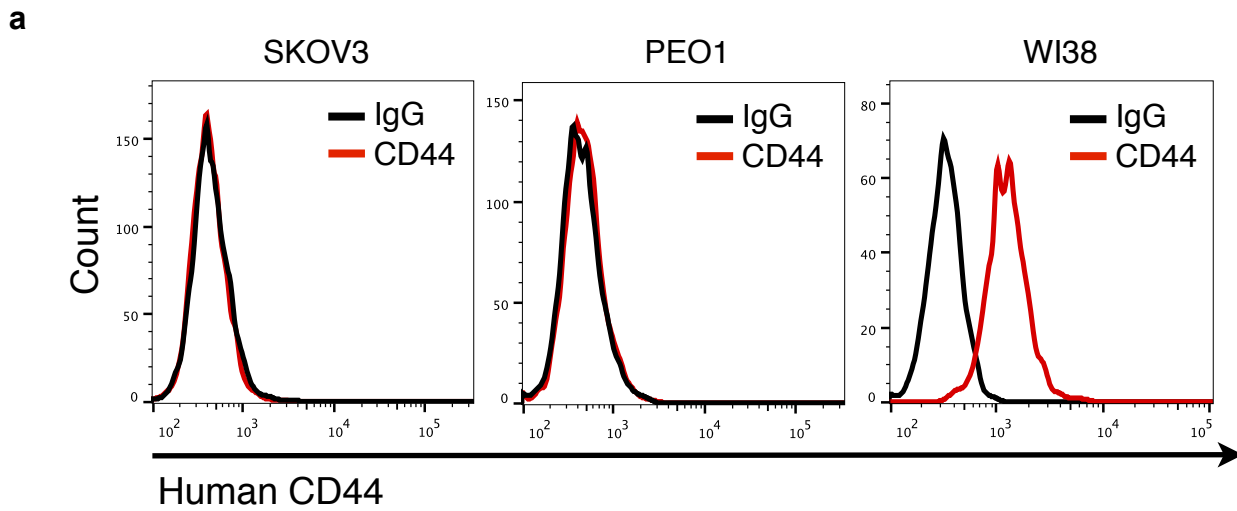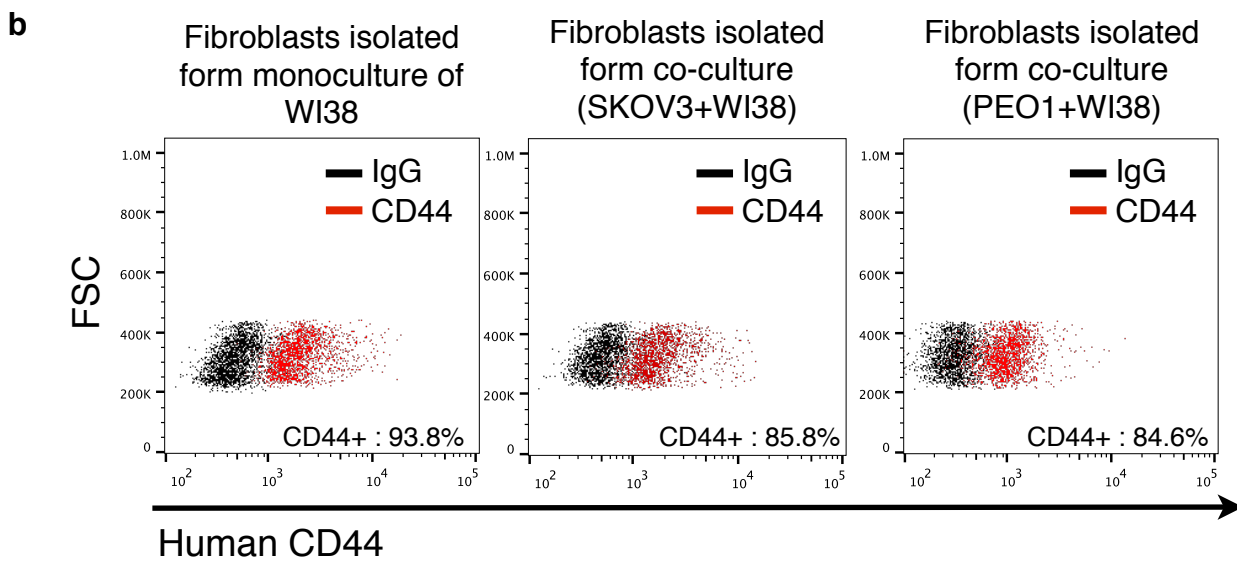

Supplement: onc2016509x3.pdf [file onc2016509x3.pdf]

Supplementary Figure 3

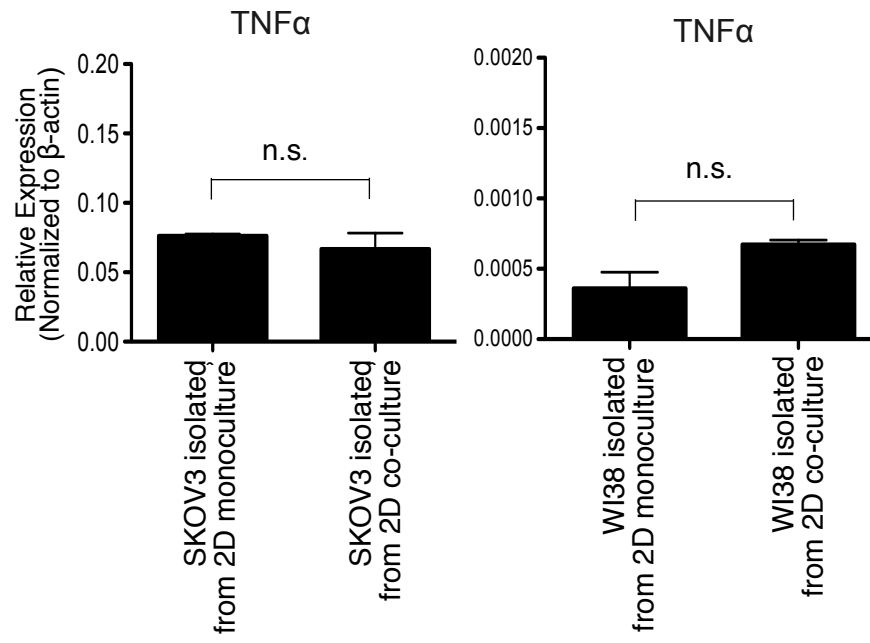

Supplement: onc2016509x4.pdf [file onc2016509x4.pdf]

Supplementary Figure 4

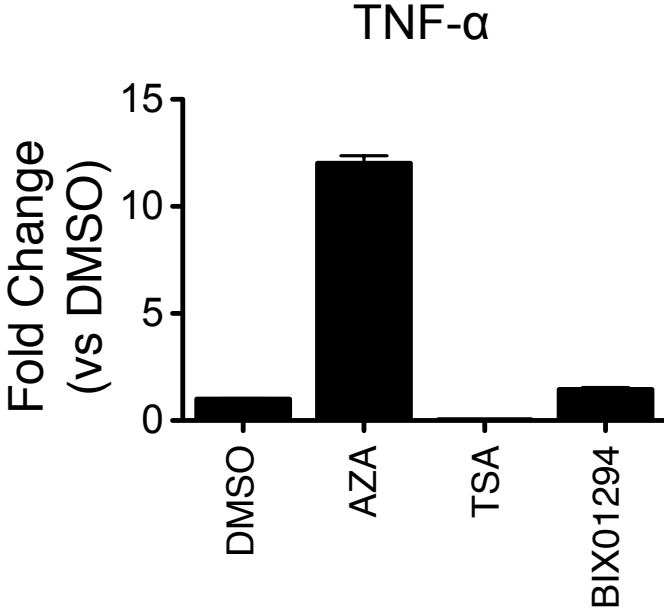

Supplement: onc2016509x5.pdf [file onc2016509x5.pdf]

Supplementary Figure 5

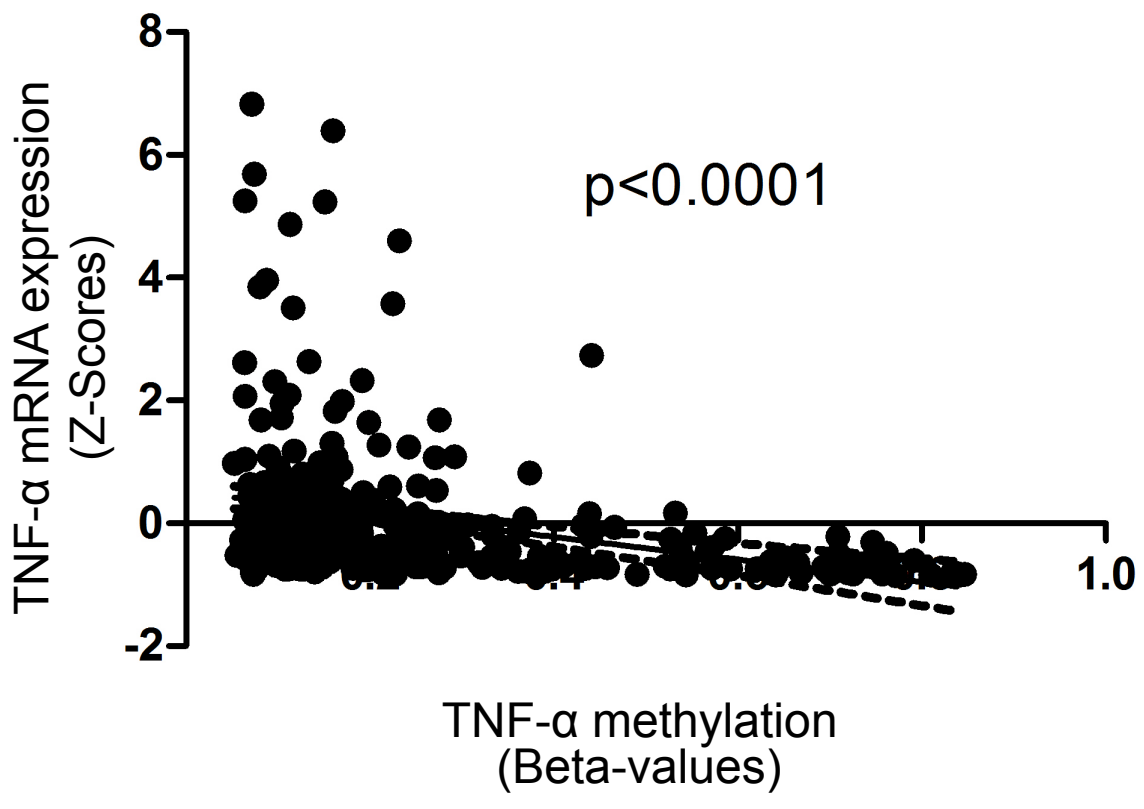

Supplement: onc2016509x6.pdf [file onc2016509x6.pdf]

Supplementary Figure 6

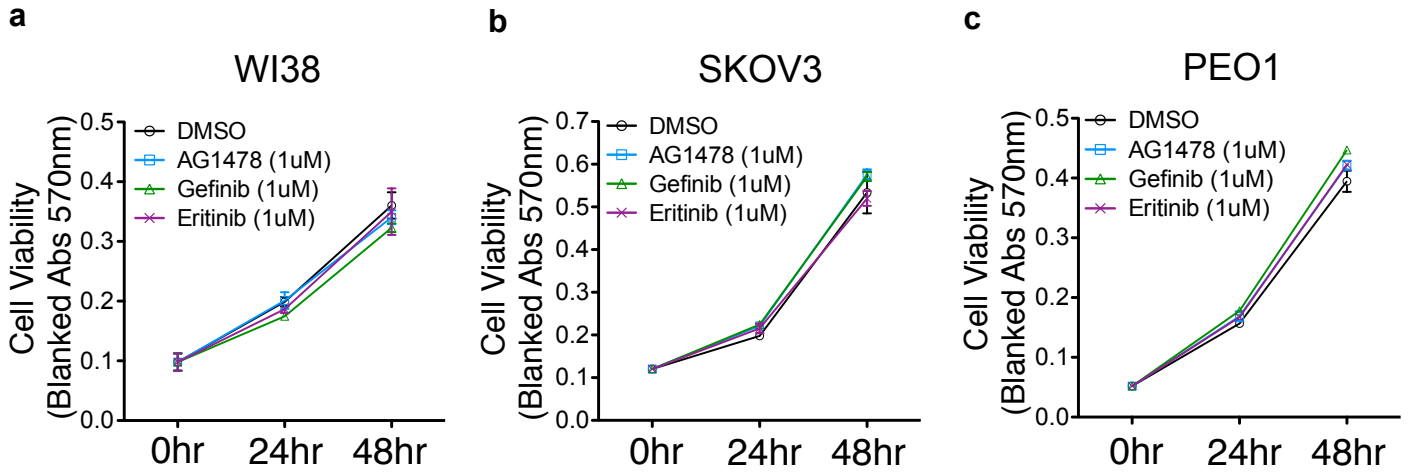

Supplement: onc2016509x7.pdf [file onc2016509x7.pdf]

Supplementary Figure 7

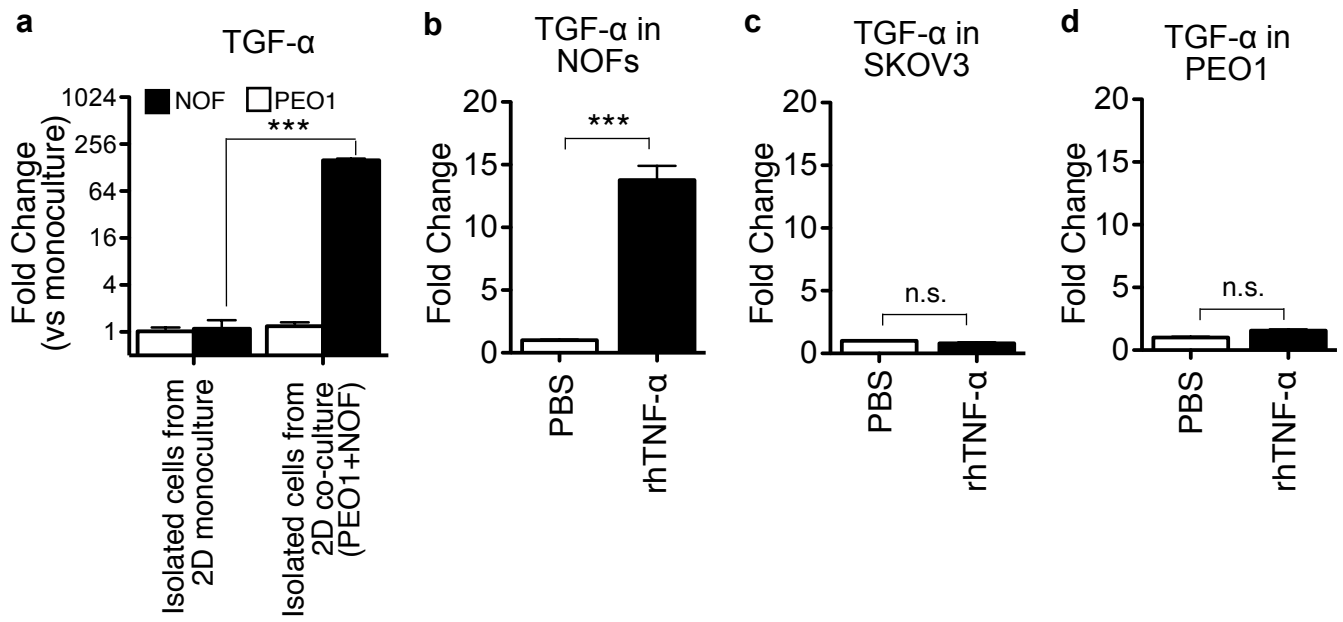

Supplement: onc2016509x8.pdf [file onc2016509x8.pdf]

Supplementary Figure 8

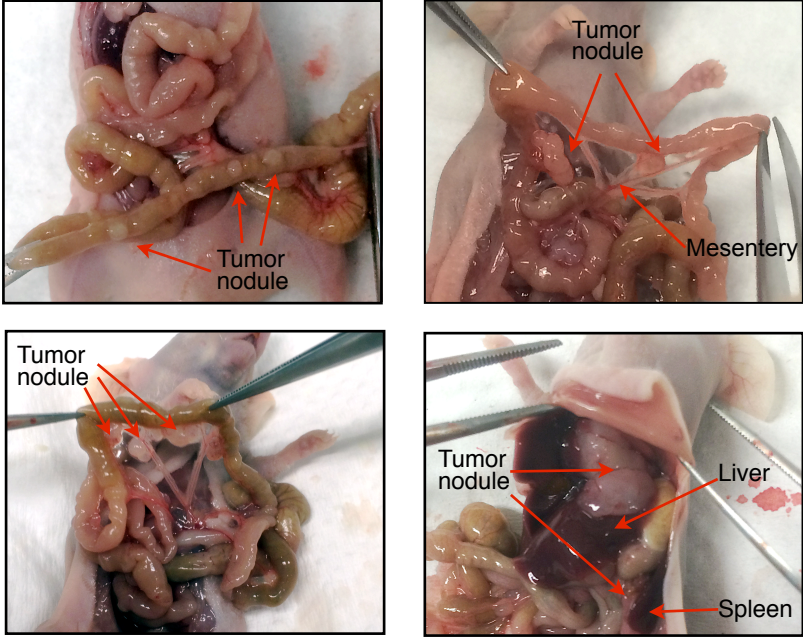

Supplement: onc2016509x9.pdf [file onc2016509x9.pdf]
